# Supplementary material
Source: PubMed Central journal article supplement (PMC11383133)
Supplement: sj-pdf-1-jfm-10.1177_1098612X13499337.pdf [file sj-pdf-1-jfm-10.1177_1098612X13499337.pdf]

1 **Supplementary table S1: Details of the new reference intervals established in Abyssinian cats reported according to the NCCLS<sup>3</sup> and**  
 2 **ASVCP<sup>4</sup> guidelines**

| Analyte                  | SI Units            | N  | Mean | SD   | Median | Min  | Max  | RI <sup>a</sup> | Lower Ref Lim<br>90% CI | Upper Ref Lim<br>90% CI | Dist. <sup>b</sup> | Method <sup>c</sup> |
|--------------------------|---------------------|----|------|------|--------|------|------|-----------------|-------------------------|-------------------------|--------------------|---------------------|
| RBC count                | 10 <sup>12</sup> /L | 45 | 9.4  | 1.3  | 9.7    | 5.9  | 12.1 | 6.0-12.1 (1S)   | 5.9-6.7                 | 10.9-12.1               | NG                 | NP                  |
| MCV                      | fL                  | 45 | 40.2 | 4.8  | 38.4   | 34.4 | 52.8 | 34.4-52.7       | 34.4-34.8               | 48.9-52.8               | NG                 | NP                  |
| MCH                      | pg/cell             | 45 | 14.0 | 1.3  | 14.1   | 11.8 | 17.8 | 11.4-16.6       | 10.8-11.9               | 16.1-17.2               | G                  | R                   |
| MCHC                     | g/L                 | 45 | 352  | 44   | 344    | 282  | 448  | 288-468         | 275-292                 | 429-509                 | NG                 | RT                  |
| Platelets                | 10 <sup>12</sup> /L | 30 | 285  | 185  | 277    | 26   | 827  | 11-776          | 0-40                    | 675-906                 | G                  | R                   |
| Lymphocytes              | 10 <sup>6</sup> /L  | 45 | 3.1  | 1.8  | 2.5    | 0.9  | 7.2  | 0.9-8.9         | 0.8-1.1                 | 6.6-12.0                | NG                 | RT                  |
| Total protein            | g/L                 | 44 | 78   | 9    | 77     | 63   | 99   | 63-98           | 63-66                   | 92-99                   | G                  | NP                  |
| Albumin                  | g/L                 | 34 | 36   | 6    | 34     | 28   | 51   | 27-54           | 26-28                   | 46-64                   | NG                 | RT                  |
| Globulin                 | g/L                 | 36 | 43   | 8    | 41     | 30   | 61   | 30-65           | 28-31                   | 57-73                   | NG                 | RT                  |
| A:G ratio                | ratio               | 36 | 0.87 | 0.25 | 0.84   | 0.48 | 1.46 | 0.44-1.45       | 0.38-0.52               | 1.30-1.62               | G                  | RT                  |
| α <sub>1</sub> -globulin | g/L                 | 36 | 2    | 1    | 2      | 1    | 4    | 0-5             | 0-1                     | 4-6                     | NG                 | RT                  |
| α <sub>2</sub> -globulin | g/L                 | 36 | 18   | 4    | 19     | 10   | 26   | 10-27           | 8-12                    | 25-29                   | G                  | RT                  |

|                     |        |    |      |      |      |      |      |                 |           |             |    |    |
|---------------------|--------|----|------|------|------|------|------|-----------------|-----------|-------------|----|----|
| $\beta_2$ -globulin | g/L    | 36 | 5    | 2    | 4    | 2    | 9    | 2-10 (1S)       | 2-3       | 8-11        | NG | RT |
| $\gamma$ -globulin  | g/L    | 36 | 13   | 04   | 12   | 6    | 22   | 6-23            | 5-7       | 19-25       | NG | RT |
| Glucose             | mmol/L | 44 | 4.70 | 0.91 | 4.65 | 3.10 | 7.71 | 3.16-7.75 (1S)  | 3.11-3.57 | 6.15-7.72   | G  | RT |
| Urea                | mmol/L | 44 | 4.35 | 0.90 | 4.17 | 2.95 | 7.40 | 2.95-7.29 (1S)  | 2.95-3.13 | 6.21-7.40   | NG | NP |
| Cholesterol         | mmol/L | 44 | 4.52 | 1.32 | 4.22 | 2.66 | 7.34 | 2.38-7.33       | 2.66-2.95 | 7.16-7.34   | NG | NP |
| ALP                 | U/L    | 44 | 56.8 | 31.8 | 53.5 | 14   | 143  | 14.1-143.0 (2S) | 14.0-17.0 | 120.5-143.0 | NG | NP |
| Phosphate           | mmol/L | 42 | 1.58 | 0.19 | 1.55 | 1.13 | 2.07 | 1.13-2.07       | 1.13-1.29 | 1.91-2.07   | G  | NP |
| Calcium             | mmol/L | 35 | 2.46 | 0.29 | 2.43 | 1.77 | 3.15 | 1.89-3.09       | 1.77-2.02 | 2.90-3.29   | G  | NP |

3 <sup>a</sup>(S) indicates the number of suspected outliers present; (R) indicates the number of far outliers identified and removed <sup>b</sup>G, Gaussian; NG, non-

4 Gaussian <sup>c</sup>Method: R, robust; T, transformed, data transformed to Gaussian prior to applying parametric or robust methods; NP: non parametric.

5 <sup>d</sup>Log transformed before analysis of reference intervals. RI: Reference interval; Ref Lim: Reference Limit; Dist: Distribution

6
