# Supplementary material
Source: PubMed Central journal article supplement (PMC11383133)
Supplement: sj-pdf-2-jfm-10.1177_1098612X13499337.pdf [file sj-pdf-2-jfm-10.1177_1098612X13499337.pdf]

1 **Supplementary table S2: Details of the new reference intervals established in Holly Birman cats reported according to the NCCLS<sup>3</sup> and**  
 2 **ASVCP<sup>4</sup> guidelines**

3

| Analyte                  | SI Units            | N  | Mean | SD   | Median | Min  | Max  | RI <sup>a</sup> | Lower Ref Lim<br>90% CI | Upper Ref Lim<br>90% CI | Dist. <sup>b</sup> | Method <sup>c</sup> |
|--------------------------|---------------------|----|------|------|--------|------|------|-----------------|-------------------------|-------------------------|--------------------|---------------------|
| Reticulocytes            | %                   | 73 | 0.4  | 0.0  | 0.4    | 0.0  | 1.9  | 0.0-1.2 (S)     | 0.0-0.0                 | 1.0-1.9                 | NG                 | NP                  |
| HCT                      | L/L                 | 84 | 0.41 | 0.07 | 0.42   | 0.25 | 0.57 | 0.29-0.55 (2S)  | 0.27-0.31               | 0.53-0.57               | G                  | R                   |
| MCV                      | fL                  | 84 | 49.6 | 4.8  | 49.7   | 37.5 | 61.0 | 40.0-59.4 (S)   | 38.6-41.7               | 58.0-60.9               | G                  | R                   |
| MCHC                     | g/L                 | 84 | 309  | 37   | 304    | 239  | 498  | 242-401 (S)     | 302-3238                | 386-412                 | NG                 | NP                  |
| Platelets (optical)      | 10 <sup>12</sup> /L | 44 | 178  | 104  | 164    | 23   | 543  | 27-488          | 23-42                   | 335-543                 | NG                 | NP                  |
| Total protein            | g/L                 | 80 | 75   | 7    | 74     | 61   | 93   | 62-88           | 61-64                   | 84-93                   | G                  | NP                  |
| Albumin                  | g/L                 | 71 | 36   | 3    | 36     | 28   | 43   | 29-42           | 28-30                   | 41-43                   | G                  | NP                  |
| α <sub>1</sub> -globulin | g/L                 | 71 | 4    | 2    | 3      | 1    | 8    | 1-8             | 1-2                     | 6-8                     | NG                 | NP                  |
| α <sub>2</sub> -globulin | g/L                 | 71 | 10   | 3    | 10     | 5    | 16   | 5-16            | 5-6                     | 13-16                   | NG                 | NP                  |
| β <sub>2</sub> -globulin | g/L                 | 71 | 6    | 2    | 6      | 2    | 9    | 2-9             | 2-3                     | 8-9                     | G                  | NP                  |
| γ-globulin               | g/L                 | 71 | 14   | 4    | 13     | 6    | 25   | 8-24            | 6-9                     | 22-25                   | NG                 | NP                  |

|             |        |    |       |      |       |      |       |                 |           |             |    |    |
|-------------|--------|----|-------|------|-------|------|-------|-----------------|-----------|-------------|----|----|
| Glucose     | mmol/L | 60 | 5.11  | 1.34 | 4.72  | 3.33 | 9.83  | 3.39-9.30       | 3.33-3.67 | 7.55-9.83   | NG | NP |
| Urea        | mmol/L | 81 | 5.23  | 1.02 | 5.16  | 2.20 | 7.78  | 3.57-7.59 (2S)  | 2.20-3.67 | 7.00-7.78   | G  | NP |
| Creatinine  | mmol/L | 81 | 150.3 | 26.5 | 150,3 | 79,6 | 221.0 | 97.2-221.0      | 79.6-97.2 | 185,6-221.0 | G  | NP |
| Cholesterol | mmol/L | 51 | 4.01  | 1.12 | 4.01  | 1.29 | 6.65  | 1.45-6.52       | 1.29-2.35 | 5.84-6.65   | G  | NP |
| ALT         | U/L    | 79 | 54.5  | 25.4 | 49.0  | 21.0 | 139.0 | 22.6-120.4 (4R) | 21.0-27.0 | 103.5-139.0 | NG | NP |

4

5 <sup>a</sup>(S) indicates the number of suspected outliers present; (R) indicates the number of far outliers identified and removed <sup>b</sup>G, Gaussian; NG, non-

6 Gaussian <sup>c</sup>Method: R, robust; T, transformed, data transformed to Gaussian prior to applying parametric or robust methods; NP: non parametric.

7 <sup>d</sup>Log transformed before analysis of reference intervals. RI: Reference interval; Ref Lim: Reference Limit; Dist: Distribution

8
