# Supplementary material
Source: PubMed Central journal article supplement (PMC11383133)
Supplement: sj-pdf-3-jfm-10.1177_1098612X13499337.pdf [file sj-pdf-3-jfm-10.1177_1098612X13499337.pdf]

1 **Supplementary table S3: Details of the new reference intervals established in Norwegian Forest cats reported according to the NCCLS<sup>3</sup> and**  
 2 **ASVCP<sup>4</sup> guidelines**

| Analyte                  | SI Units            | N  | Mean | SD   | Median | Min  | Max  | RI <sup>a</sup> | Lower Ref Lim<br>90% CI | Upper Ref Lim<br>90% CI | Dist. <sup>b</sup> | Method <sup>c</sup> |
|--------------------------|---------------------|----|------|------|--------|------|------|-----------------|-------------------------|-------------------------|--------------------|---------------------|
| RBC                      | 10 <sup>12</sup> /L | 42 | 8.8  | 1.6  | 9.2    | 4.5  | 10.8 | 4.5-10.8        | 4.5-5.8                 | 10.6-10.8               | NG                 | NP                  |
| Reticulocytes            | %                   | 30 | 0.4  | 0.2  | 0.3    | 0    | 0.87 | 0.1-0.8 (3S)    | 0.0-0.1                 | 0.6-1.0                 | NG                 | RT                  |
| HCT                      | L/L                 | 42 | 0.39 | 0.07 | 0.40   | 0.22 | 0.55 | 0.22-0.55 (1S)  | 0.22-0.29               | 0.49-0.55               | G                  | NP                  |
| MCH                      | pg/cell             | 42 | 14.1 | 1.1  | 13.9   | 12.2 | 18.1 | 12.3-16.9       | 12.0-12.9               | 15.8-18.2               | NG                 | RT                  |
| MCHC                     | g/L                 | 42 | 315  | 27   | 316    | 249  | 389  | 249-389 (4S)    | 249-264                 | 345-389                 | NG                 | NP                  |
| WBC                      | 10 <sup>6</sup> /L  | 42 | 9.5  | 4.6  | 8.3    | 2.5  | 21.5 | 2.5-21.2        | 2.5-3.5                 | 17.6-21.5               | NG                 | NP                  |
| Platelets                | 10 <sup>12</sup> /L | 27 | 183  | 118  | 158    | 12   | 539  | 12-493          | 2-37                    | 390-613                 | G                  | RT                  |
| Albumin                  | g/L                 | 28 | 34   | 9    | 35     | 21   | 54   | 19-55           | 17-22                   | 49-60                   | G                  | RT                  |
| Globulin                 | g/L                 | 28 | 28   | 6    | 29     | 15   | 42   | 16-41           | 13-20                   | 37-45                   | G                  | RT                  |
| A:G ratio                | ratio               | 28 | 1.29 | 0.54 | 1.18   | 0.54 | 2.69 | 0.47-2.67       | 0.40-0.60               | 2.17-3.19               | NG                 | RT                  |
| α <sub>1</sub> -globulin | g/L                 | 28 | 2    | 1    | 2      | 1    | 3    | 1-3             | 1-1                     | 3-4                     | G                  | RT                  |
| α <sub>2</sub> -globulin | g/L                 | 28 | 7    | 3    | 6      | 3    | 13   | 1-14            | 0-2                     | 12-16                   | G                  | RT                  |

|                     |        |    |       |       |       |      |       |                |           |             |    |    |
|---------------------|--------|----|-------|-------|-------|------|-------|----------------|-----------|-------------|----|----|
| $\beta_2$ -globulin | g/L    | 28 | 4     | 1     | 4     | 1    | 6     | 1-7            | 1-2       | 6-8         | G  | RT |
| $\gamma$ -globulin  | g/L    | 28 | 11    | 4     | 11    | 4    | 20    | 3-21           | 2-5       | 18-24       | G  | RT |
| Urea                | mmol/L | 28 | 4.27  | 1.04  | 4.08  | 2.57 | 7.03  | 2.77-7.25 (1S) | 2.56-3.06 | 5.94-9.03   | NG | RT |
| Cholesterol         | mmol/L | 26 | 3.67  | 0.97  | 3.56  | 2.20 | 5.77  | 2.25-6.89      | 2.05-2.24 | 5.30-8.09   | NG | RT |
| ALP                 | U/L    | 28 | 161.2 | 108.3 | 133.5 | 23.0 | 374.0 | 21.6-505.0     | 12.8-36.9 | 378.1-649.0 | NG | RT |
| Phosphate           | mmol/L | 24 | 3.21  | 0.71  | 3.52  | 2.10 | 4.59  | 1.74-4.97      | 1.52-2.29 | 4.52-5.30   | G  | RT |
| Calcium             | mmol/L | 24 | 2.54  | 0.55  | 2.71  | 1.64 | 3.55  | 1.36-3.84      | 1.17-1.77 | 3.51-4.11   | G  | RT |

3 <sup>a</sup>(S) indicates the number of suspected outliers present; (R) indicates the number of far outliers identified and removed <sup>b</sup>G, Gaussian; NG, non-  
4 Gaussian <sup>c</sup>Method: R, robust; T, transformed, data transformed to Gaussian prior to applying parametric or robust methods; NP: non parametric.  
5 <sup>d</sup>Log transformed before analysis of reference intervals. RI: Reference interval; Ref Lim: Reference Limit; Dist: Distribution

6
