# Supplementary material
Source: PubMed Central journal article supplement (PMC11383133)
Supplement: sj-pdf-4-jfm-10.1177_1098612X13499337.pdf [file sj-pdf-4-jfm-10.1177_1098612X13499337.pdf]

1 **Supplementary table S4: Details of the new reference intervals established in Siberian cats reported according to the NCCLS<sup>3</sup> and ASVCP<sup>4</sup>**  
 2 **guidelines**

| Analyte                  | SI Units            | N  | Mean | SD   | Median | Min  | Max  | RI <sup>a</sup> | Lower Ref Lim<br>90% CI | Upper Ref Lim<br>90% CI | Dist. <sup>b</sup> | Method <sup>c</sup> |
|--------------------------|---------------------|----|------|------|--------|------|------|-----------------|-------------------------|-------------------------|--------------------|---------------------|
| Reticulocytes            | %                   | 44 | 0.5  | 0.3  | 0.5    | 0.0  | 2.1  | 0.0-1.9 (2S)    | 0.0-0.2                 | 1.0-2.1                 | NG                 | NP                  |
| HCT                      | L/L                 | 44 | 0.41 | 0.09 | 0.40   | 0.22 | 0.66 | 0.23-0.65 (1S)  | 0.22-0.28               | 0.57-0.66               | G                  | NP                  |
| MCV                      | fL                  | 44 | 46.5 | 6.4  | 45.8   | 35.9 | 59.9 | 36.0-59.7       | 35.9-36.8               | 57.4-60.0               | G                  | NP                  |
| MCH                      | pg/cell             | 44 | 14.5 | 1.6  | 14.1   | 12.8 | 23.0 | 12.8-22.1       | 12.8-12.9               | 15.6-23.0               | NG                 | NP                  |
| MCHC                     | g/L                 | 44 | 316  | 56   | 312    | 239  | 580  | 239-559 (1S)    | 239-251                 | 382-580                 | NG                 | NP                  |
| Platelets                | 10 <sup>12</sup> /L | 32 | 256  | 135  | 243    | 33   | 522  | 34-522          | 33-64                   | 472-522                 | G                  | NP                  |
| Total protein            | g/L                 | 43 | 58   | 8    | 55     | 47   | 84   | 47-83           | 47-49                   | 70-84                   | NG                 | NP                  |
| Albumin                  | g/L                 | 43 | 37   | 3    | 37     | 30   | 45   | 30-45           | 30-32                   | 43-45                   | G                  | NP                  |
| Globulin                 | g/L                 | 43 | 21   | 6    | 19     | 13   | 40   | 14-40           | 13-14                   | 33-40                   | NG                 | NP                  |
| A:G ratio                | ratio               | 43 | 1.88 | 0.51 | 1.82   | 0.99 | 2.85 | 1.00-2.84       | 0.99-1.13               | 2.65-2.85               | G                  | NP                  |
| α <sub>1</sub> -globulin | g/L                 | 42 | 1    | 0    | 1      | 1    | 3    | 1-3             | 1-1                     | 2-3                     | NG                 | NP                  |
| β <sub>1</sub> -globulin | g/L                 | 42 | 4    | 1    | 3      | 2    | 7    | 2-7             | 2-2                     | 6-7                     | NG                 | NP                  |

|                     |        |    |       |      |       |      |       |                |           |             |    |    |
|---------------------|--------|----|-------|------|-------|------|-------|----------------|-----------|-------------|----|----|
| $\beta_2$ -globulin | g/L    | 42 | 2     | 2    | 2     | 1    | 9     | 1-9            | 1-1       | 5-9         | NG | NP |
| $\gamma$ -globulin  | g/L    | 42 | 7     | 3    | 6     | 3    | 13    | 3-13           | 3-3       | 11-13       | NG | NP |
| Glucose             | mmol/L | 38 | 4.66  | 1.47 | 4.36  | 1.83 | 8.66  | 2.03-8.04      | 1.62-2.56 | 7.08-9.01   | G  | RT |
| Urea                | mmol/L | 47 | 4.73  | 1.19 | 4.64  | 2.33 | 7.61  | 2.35-7.55 (3S) | 2.33-2.85 | 6.78-7.61   | G  | NP |
| Creatinine          | mmol/L | 44 | 123.8 | 35.4 | 123.8 | 53.0 | 221.0 | 53.0-221.0     | 53.0-79.6 | 185.6-221.0 | G  | NP |
| Cholesterol         | mmol/L | 44 | 3.72  | 1.33 | 3.48  | 0.39 | 7.65  | 0.58-7.48 (2S) | 0.39-2.01 | 6.07-7.65   | NG | NP |
| ALT                 | U/L    | 42 | 65.4  | 34.3 | 62.0  | 2.0  | 163.0 | 2.1-161.0 (2S) | 2.0-16.2  | 116.1-163.0 | G  | NP |
| ALP                 | U/L    | 41 | 69.7  | 42.6 | 62.0  | 7.0  | 186.0 | 7.9-185.8 (1S) | 7.0-20.5  | 158.3-186.0 | NG | NP |
| Phosphate           | mmol/L | 34 | 2.81  | 0.42 | 2.81  | 1.84 | 4.20  | 2.03-3.81 (2S) | 1.91-2.26 | 3.49-4.20   | NG | RT |
| Calcium             | mmol/L | 34 | 2.18  | 0.34 | 2.16  | 1.43 | 3.24  | 1.59-2.95 (2S) | 1.47-1.74 | 2.70-3.24   | NG | RT |

3  
4 <sup>a</sup>(S) indicates the number of suspected outliers present; (R) indicates the number of far outliers identified and removed <sup>b</sup>G, Gaussian; NG, non-  
5 Gaussian <sup>c</sup>Method: R, robust; T, transformed, data transformed to Gaussian prior to applying parametric or robust methods; NP: non parametric.  
6 <sup>d</sup>Log transformed before analysis of reference intervals. RI: Reference interval; Ref Lim: Reference Limit; Dist: Distribution

7
